# Supplementary material for: Superconducting Be2SH3 with kagome hydrogen at high pressure
Source: Royal Society of Chemistry journal article supplement (doi:10.1039/d3tc00922j), 2023-01-01
Supplement: d3tc00922j1.pdf [file d3tc00922j1.pdf]

## Supporting Information

### Superconducting Be<sub>2</sub>SH<sub>3</sub> with hydrogen kagome lattice at high pressure

Tingting Gu, Wenwen Cui,<sup>\*</sup> Jian Hao, Jingming Shi, and Yinwei Li<sup>\*</sup>

Laboratory of Quantum Functional Materials Design and Application, School of Physics and Electronic Engineering, Jiangsu Normal University, Xuzhou 221116, China

E-mail: wenwencui@jsnu.edu.cn; yinwei\_li@jsnu.edu.cn

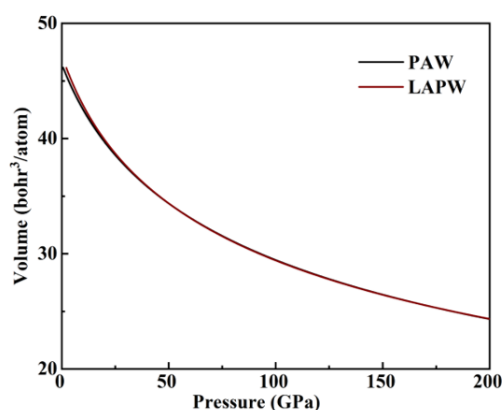

Fig. S00 Comparison of the fitted Birch-Murnaghan equation of states for *P6/mmm* Be<sub>2</sub>SH<sub>3</sub> using calculated results with the PAW pseudopotentials and full-potential LAPW methods.

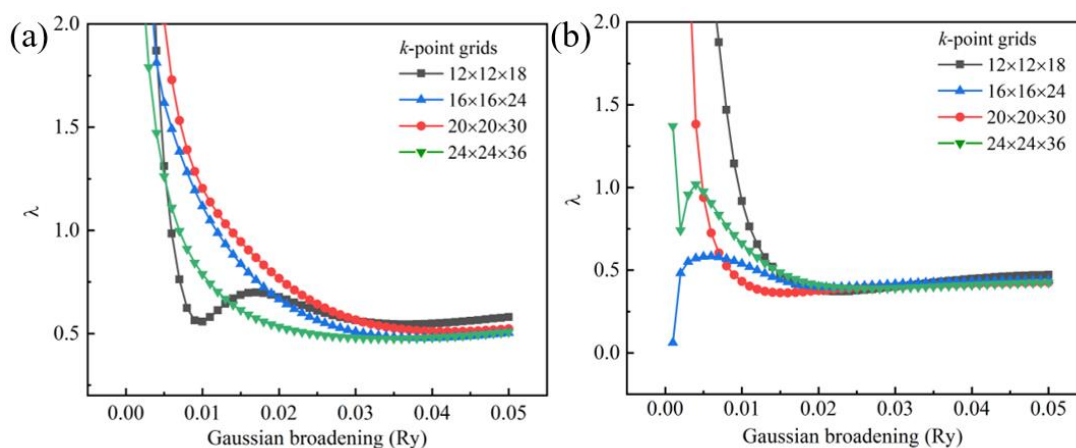

Fig. S01 Electron-phonon coupling constant,  $\lambda$ , versus Gaussian broadening,  $\sigma$ , for *P6/mmm* Be<sub>2</sub>SH<sub>3</sub> at 200 GPa at  $q = (0, 0, 0)$  (a) and  $q = (0, 0, 0.554628)$  (b) using various  $k$ -grids. In (a) and (b) the  $k$ -meshes  $16 \times 16 \times 24$  are considered to be converged for acquiring an accurate  $\lambda$ .

Table. S1. Superconducting parameters for  $P6/mmm$   $\text{Be}_2\text{SH}_3$  at 200 GPa: electron-phonon coupling parameter ( $\lambda$ ), logarithmic average of phonon frequencies ( $\omega_{\log}$ ) and estimated superconducting critical temperature ( $T_c$ ) for values of the Coulomb pseudopotential, using the listed q-grids.

| $q$ -meshes           | $\lambda$ | $\omega_{\log}$ (K) | $T_c$ (K) |
|-----------------------|-----------|---------------------|-----------|
| $4 \times 4 \times 6$ | 0.53      | 1161.28             | 18        |
| $6 \times 6 \times 9$ | 0.58      | 1029.08             | 22        |

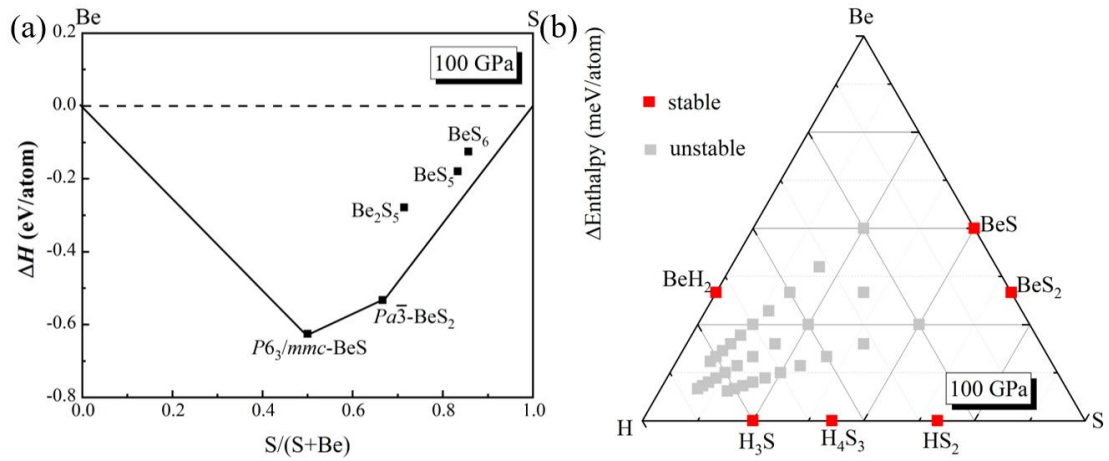

Fig. S1 (a) Convex hull of Be-S system and (b) Phase diagram of Be-S-H system at 100 GPa.

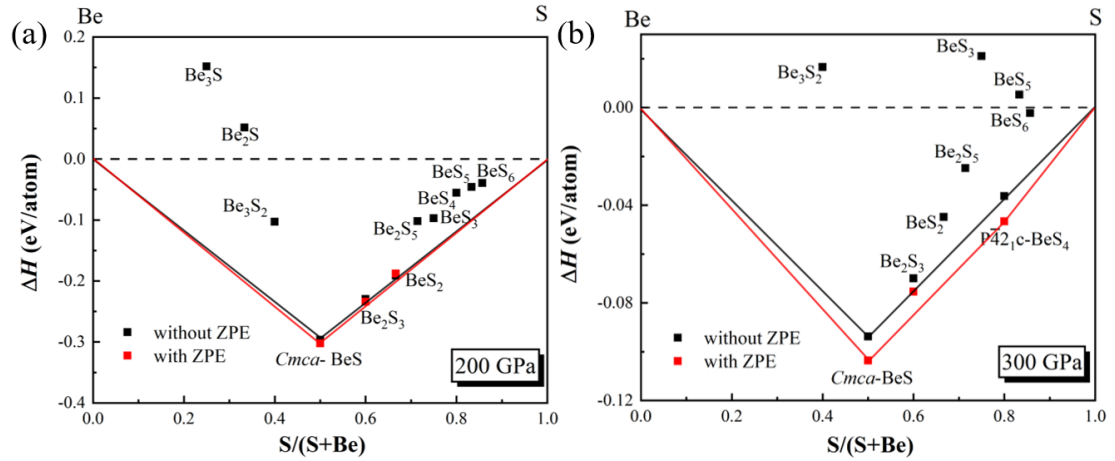

Fig. S2 Phase diagram of Be-S system at (a) 200 GPa, (b) 300 GPa. Convex hulls are shown as continuous lines, with (red) and without (black) the inclusion of zero-point vibrational enthalpy (ZPE).

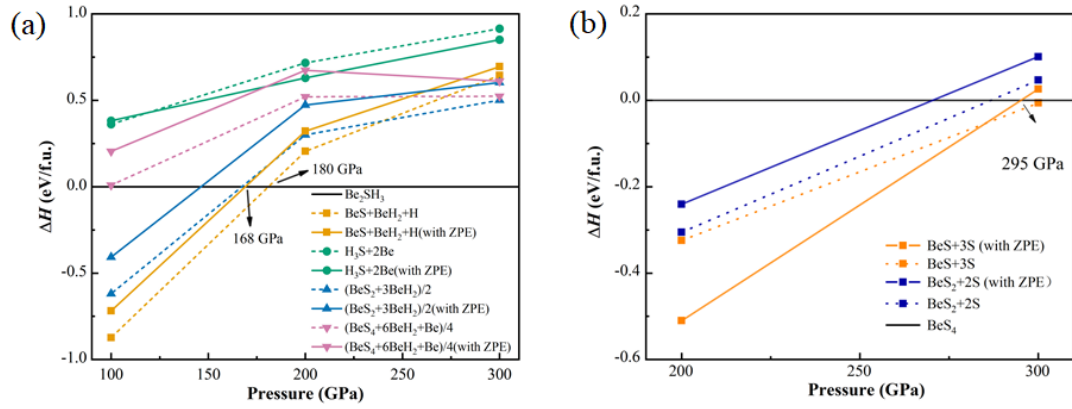

Fig. S3 The calculated formation enthalpy of (a)  $P6/mmm$   $\text{Be}_2\text{SH}_3$  and (b)  $P\bar{4}2_1c$   $\text{BeS}_4$  and crystal as a function of pressure relative to the competing element and binary compounds.

Table. S2. Charge transfer of Be, S and H atoms in one unit cell. The negative and positive signs indicate electron gain and loss, respectively.

| Phases                            | Pressure (GPa) | Atoms   | Charge (e) |
|-----------------------------------|----------------|---------|------------|
| $P\bar{4}2_1c$ $\text{BeS}_4$     | 180            | Be (2a) | -1.63      |
|                                   |                | S (8e)  | 0.41       |
| $P\bar{4}2_1c$ $\text{BeS}_4$     | 300            | Be (2a) | -1.62      |
|                                   |                | S (8e)  | 0.41       |
| $P6/mmm$ $\text{Be}_2\text{SH}_3$ | 100            | Be (2d) | -1.65      |
|                                   |                | S (1b)  | 0.97       |
|                                   |                | H (3f)  | 0.78       |
| $P6/mmm$ $\text{Be}_2\text{SH}_3$ | 200            | Be (2d) | -1.65      |
|                                   |                | S (1b)  | 1.11       |
|                                   |                | H (3f)  | 0.73       |
| $P6/mmm$ $\text{Be}_2\text{SH}_3$ | 300            | Be (2d) | -1.64      |
|                                   |                | S (1b)  | 1.17       |
|                                   |                | H (3f)  | 0.70       |

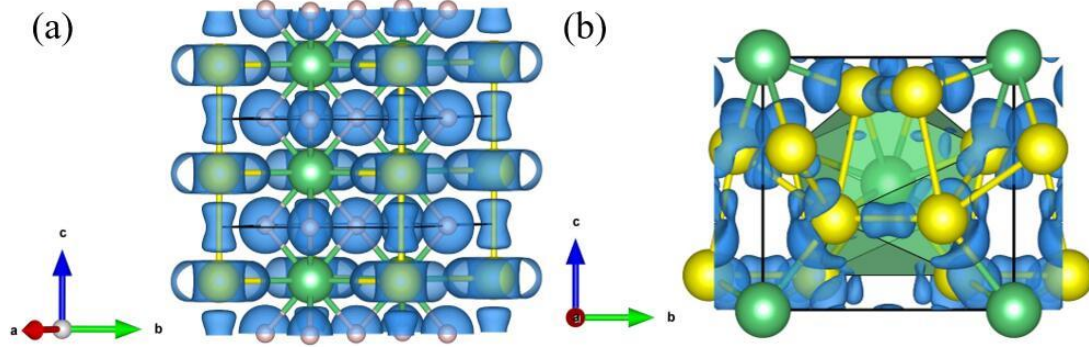

Fig. S4 The ELF of (a)  $P6/mmm$   $\text{Be}_2\text{SH}_3$  at 200 GPa and (b)  $P42_1c$   $\text{BeS}_4$  at 300 GPa, the ELF isosurfaces with a value of 0.75.

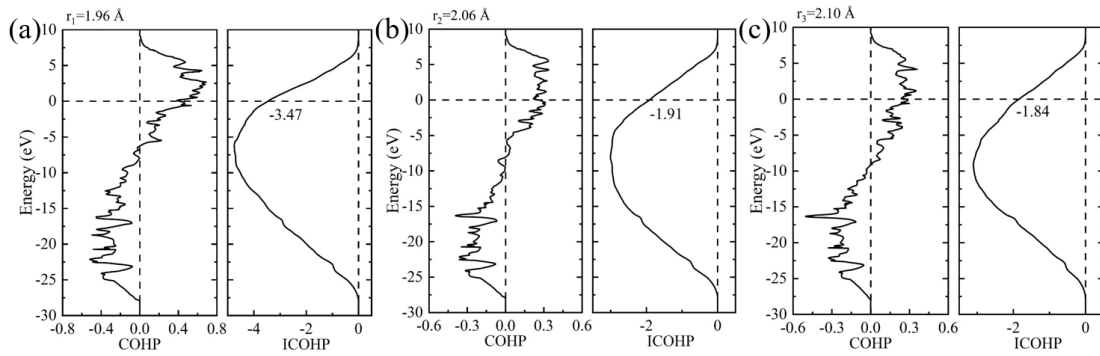

Fig. S5 The calculated Crystalline Orbital Hamiltonian Population (COHP) and Integrated Crystalline Orbital Hamiltonian Population (ICOHP) of  $\text{BeS}_4$  with S-S distances of (a) 1.96, (b) 2.06 and (c) 2.10 Å at 300 GPa. The horizontal lines present the Fermi levels. The negative COHP indicates bonding and positive COHP indicates antibonding and the negative ICOHP values represent the bonding interactions between the S atoms.

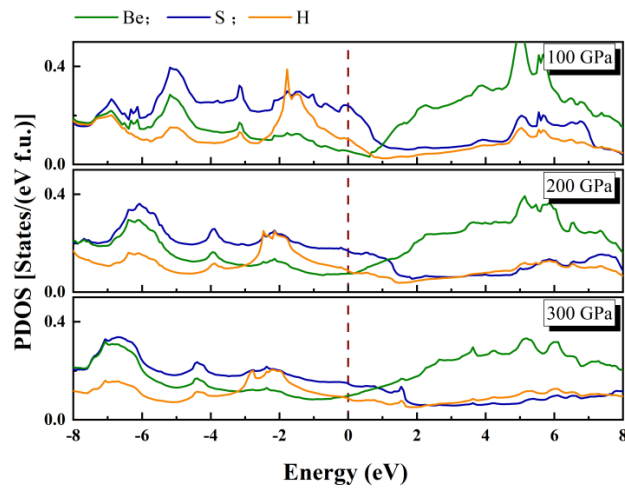

Fig. S6 Atom-projected density of states near the Fermi level for  $P6/mmm$   $\text{Be}_2\text{SH}_3$  at 100 GPa, 200 GPa and 300 GPa.

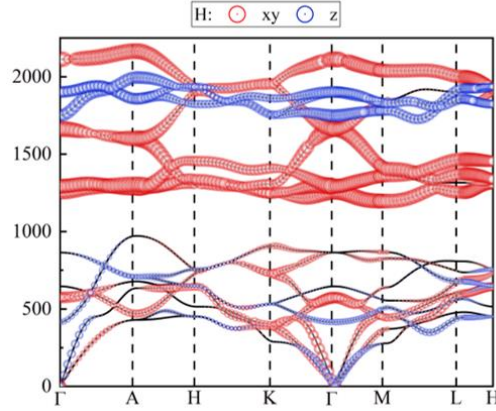

Fig. S7. Calculated phonon spectra for  $P6/mmm$   $\text{Be}_2\text{SH}_3$  at 200 GPa highlighting the primary nature of the different modes.  $xy$  shown as red are in-plane vibrations and  $z$  shown as blue are out-of-plane vibrations.

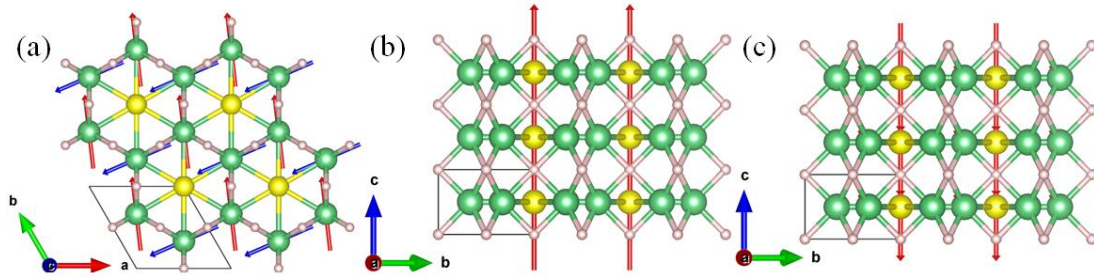

Fig. S8 The vibrational modes at (a)  $\Gamma$ -A (b) H-K and (c) M-L of  $P6/mmm$   $\text{Be}_2\text{SH}_3$  at 100 GPa. The arrows represent the direction of atomic vibration.

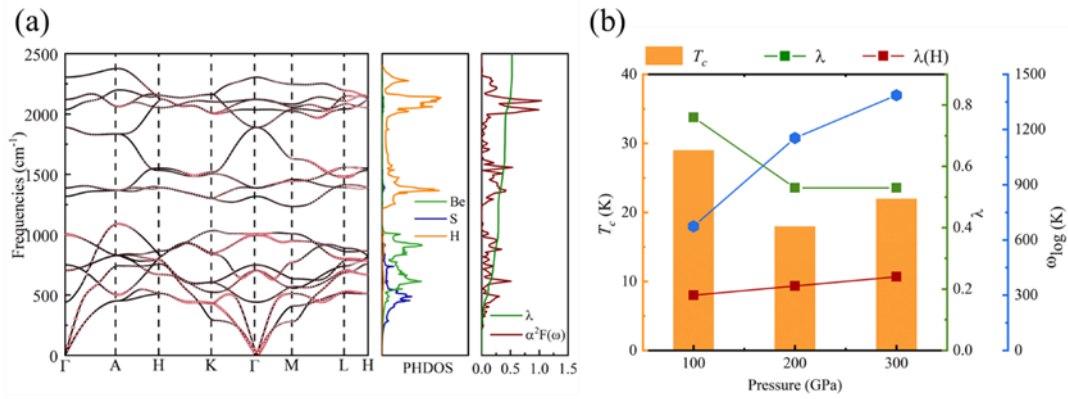

Fig. S9 (a) Phonon-dispersion curves, PHDOS, projected on the Be, S, and H atoms, Eliashberg spectral function,  $\alpha^2F(\omega)$  and  $\lambda$  for  $P6/mmm$   $\text{Be}_2\text{SH}_3$  at 300 GPa. (b) Pressure dependence of  $T_c$ , the logarithmic average phonon frequency  $\omega_{\log}$ , the total EPC parameter  $\lambda$  and the contribution of H atoms to the total  $\lambda$ , namely  $\lambda(\text{H})$ , for  $P6/mmm$   $\text{Be}_2\text{SH}_3$ .

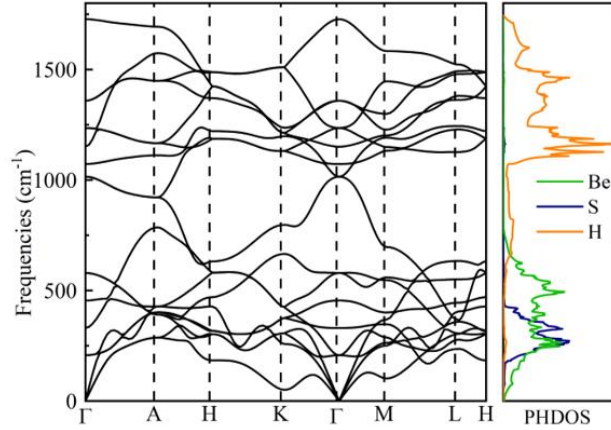

Fig. S10 Phonon dispersion curves of  $P6/mmm$   $\text{Be}_2\text{SH}_3$  at the pressure of 60 GPa, PHDOS, projected on the Be, S, and H atoms.

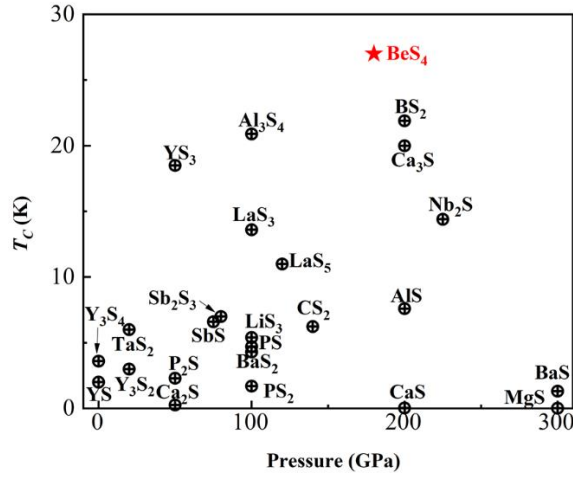

Fig. S11  $T_c$  values of the reported binary chalcogenides at high pressure.

Table S3. The structure information of  $P6/mmm$   $\text{Be}_2\text{SH}_3$  at 200 GPa and  $\bar{P}42_1c$   $\text{BeS}_4$  at 300 GPa.

| Space group                       | Lattice parameters | Atomic coordinates |         |          | Sites   |    |
|-----------------------------------|--------------------|--------------------|---------|----------|---------|----|
| Pressure                          | (Å)                |                    |         |          |         |    |
| $P6/mmm$ $\text{Be}_2\text{SH}_3$ | a=3.48             | Be                 | 0.33333 | 0.66667  | 0.50000 | 2d |
| 200 GPa                           | c=2.06             | S                  | 0.00000 | -0.00000 | 0.50000 | 1b |
|                                   |                    | H                  | 0.50000 | -0.00000 | 0.00000 | 3f |
| $\bar{P}42_1c$ $\text{BeS}_4$     | a=4.21             | Be                 | 0.00000 | 0.00000  | 0.00000 | 2a |
| 300 GPa                           | c=4.37             | S                  | 0.88184 | 0.70802  | 0.37436 | 8e |
